# Supplementary material
Source: Springer Nature journal article supplement (https://www.springermedizin.de/resource/supplementary/13633_2014_352_MOESM6_ESM.pdf/9596138)

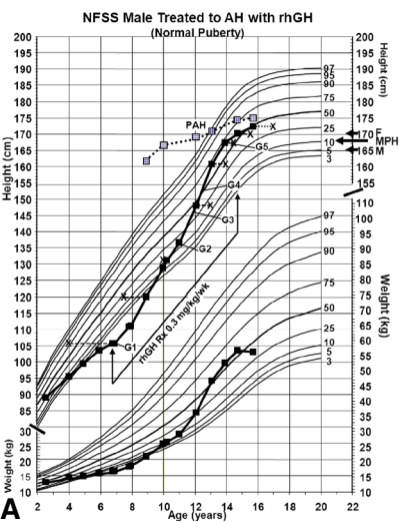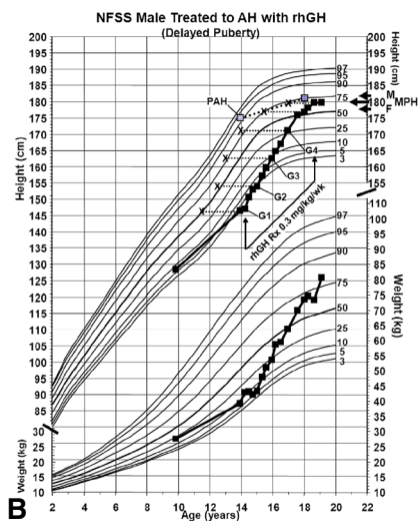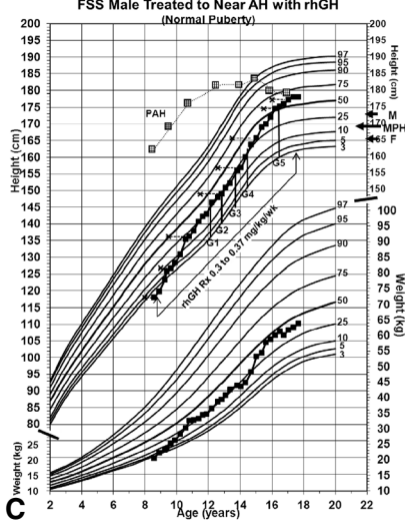

X = bone age; G = gonadal stage; F = father; M = mother; MPH = midparental height; PAH = predicted adult height

Supplement: MOESM6 [file 9596138]
